# Supplementary material for: Satellite remote sensing of environmental variables can predict acoustic activity of an orthopteran assemblage
Source: PeerJ journal article supplement (doi:10.7717/peerj.13969), 2022-09-02
Supplement: Spanish_language_ver_-_Satellite_remote_sensing_of_environmental.pdf [file Spanish_language_ver_-_Satellite_remote_sensing_of_environmental.pdf]

# 1 Teledetección de variables ambientales por satélite 2 puede predecir la actividad acústica de un ensamblaje 3 de ortópteros

4 Diego A. Gomez-Morales<sup>1,2</sup> , Orlando Acevedo-Charry<sup>3,4</sup>

5

6 <sup>1</sup> Departamento de Biología, Universidad Nacional de Colombia, Bogotá, D.C., Colombia.

7 <sup>2</sup> Department of Biology, California State University, Northridge, CA, USA

8 <sup>3</sup> Colección de Sonidos Ambientales *Mauricio Álvarez-Rebolledo*, Colecciones Biológicas,  
9 Subdirección de Investigaciones, Instituto de Investigación de Recursos Biológicos Alexander  
10 von Humboldt, Villa de Leyva, Boyacá, Colombia

11 <sup>4</sup> School of Natural Resources and Environment, Department of Wildlife Ecology and  
12 Conservation, & Florida Museum of Natural History, University of Florida, Gainesville, FL,  
13 USA

14

15 Correspondencia:

16 Diego A. Gomez-Morales<sup>1</sup>

17 Department of Biology, California State University Northridge, 18111 Nordhoff Street,  
18 Northridge, CA, 91330-8303, USA

19 Email address: [diego.gomez.519@my.csun.edu](mailto:diego.gomez.519@my.csun.edu)

20

## 21 Resumen

22

23 El Monitoreo Acústico Pasivo (PAM en inglés) es un método de evaluación de la biodiversidad  
24 que permite muestreos más extensos y menos intrusivos que otros métodos tradicionales (p. e.,  
25 colecta de especímenes), al usar grabaciones de audio como fuente de información. Los  
26 insectos tienen un gran potencial como modelos para el estudio y monitoreo de ensamblajes  
27 acústicos debido a su sensibilidad a cambios ambientales. Sin embargo, los estudios de  
28 ecoacústica enfocados en insectos aún son escasos si se comparan con grupos más  
29 carismáticos. Los patrones de actividad de los insectos responden a factores ambientales como  
30 temperatura, luz de luna, o precipitación; a pesar de ello, perspectivas de comunidad acústica  
31 aún han sido poco exploradas. En este trabajo presentamos un ejemplo de la utilidad de PAM  
32 para monitoreo de patrones temporales de actividad en un ensamblaje de insectos nocturnos  
33 (Orthoptera). Integramos medidas de factores ambientales de sensores remotos y estimaciones  
34 astronómicas a escala local en un Bosque Andino de Colombia y evaluamos la respuesta  
35 acústica de los ortópteros a través de detecciones automáticas de sus cantos durante nueve  
36 semanas (marzo y abril de 2020). Describimos el rango de frecuencia y la actividad acústica  
37 diaria de cada especie representativa. Tres especies se solaparon en frecuencia y actividad  
38 diaria, pero habitan diferentes estratos: dosel, sotobosque y a nivel del suelo. Según la  
39 frecuencia y actividad acústica, identificamos tres tendencias: i) las dos especies de grillos  
40 cantan a menores frecuencias, por períodos de tiempo más cortos (anochecer); ii) las especies

41 de esperanzas cantan a frecuencias más altas, y por períodos de tiempo más largos, a lo largo  
42 de la noche; y iii) la ventana de actividad acústica diaria parece aumentar proporcionalmente  
43 con la frecuencia acústica dominante, sin embargo, se requieren estudios más detallados en  
44 este aspecto. También identificamos un coro del anochecer en el cual todas las especies  
45 cantan al mismo tiempo. Para cuantificar la respuesta a factores ambientales, calculamos una  
46 regresión beta con la actividad acústica como variable respuesta de luz de luna, temperatura  
47 superficial, y precipitación como variables explicativas. La respuesta a luz de luna fue  
48 significativa para las esperanzas, pero no para los grillos, debido posiblemente a las diferencias  
49 en actividad acústica diaria. Los grillos son activos durante el anochecer solamente, así que los  
50 efectos de la luz de luna son insignificantes. La respuesta a precipitación fue significativa para  
51 los dos grillos, pero no para las esperanzas; debido posiblemente a la mayor probabilidad de  
52 que la lluvia interrumpa las ventanas de los grillos, al ser menos extensas. Nuestro estudio  
53 muestra como el muestreo de ensamblajes acústicos de ortópteros a resolución taxonómica de  
54 especie acoplado con mediciones de sensores remotos puede revelar respuestas a factores  
55 ambientales. Adicionalmente, demostramos como la información satelital puede ser una fuente  
56 alternativa de datos ambientales para estudios a nivel de comunidad con limitaciones  
57 geográficas, financieras, u otras.

58

## 59 **Introducción**

60

61 Muchos animales utilizan la señalización acústica como su principal forma de comunicación  
62 (Bradbury & Vehrencamp, 2011), así contribuyendo al componente biótico del paisaje sonoro  
63 (Pijanowski et al. 2011). Las preguntas ecológicas sobre el comportamiento, la actividad  
64 estacional o la respuesta a factores externos de los animales a diferentes escalas ecológicas y  
65 temporales de las comunidades acústicas pueden abordarse con el monitoreo acústico (Sugai et  
66 al., 2019; Gottesman et al., 2021; Chhaya et al., 2021). Este puede realizarse con grabación  
67 directa en persona, en campo (Drewry & Rand, 1983; Diwakar & Balakrishnan, 2007a), o con  
68 grabación automática pasiva (Deichmann et al., 2018). El Monitoreo Acústico Pasivo (PAM) se  
69 ha convertido en uno de los métodos más populares para obtener grabaciones ambientales  
70 gracias al creciente acceso a las nuevas tecnologías de grabación e incremento en potencia de  
71 cálculo (Riede, 2018; Sugai et al., 2019). El PAM consiste en el despliegue de grabadoras  
72 autónomas pasivas sobre el terreno. Este implica ventajas cuando se usa para el monitoreo de la  
73 biodiversidad como períodos de evaluación más largos, métodos menos intrusivos, mayor  
74 recolección de datos y mayor potencial para la investigación bioacústica de comunidades a  
75 diferentes escalas, si se compara con enfoques clásicos como la recolección de especímenes en  
76 campo (Blumstein et al., 2011; Deichmann et al., 2018; Sugai et al., 2020). Además, PAM  
77 permite clasificar los cantos de llamado en unidades taxonómicas reconocibles, también  
78 denominadas morfoespecies acústicas o sonotipos (Riede, 1998; Aide et al., 2013; Ferreira et al.,  
79 2018). A pesar de ello, sigue habiendo problemas cuando se aplica a grupos taxonómicos muy  
80 diversos con poca disponibilidad de descripciones taxonómicas y acústicas, como los insectos  
81 (Riede, 2018). Para abordar estos retos, monitoreamos acústicamente un ensamblaje de

82 ortópteros nocturnos y asignamos los sonotipos a sus respectivas especies taxonómicas  
83 identificadas a partir de especímenes capturados en el sitio.

84

85 Los sonidos de los insectos impulsan los paisajes sonoros tropicales con sus llamados que varían  
86 en tiempo, frecuencia acústica y escalas espaciales (Aide et al., 2017). Además, los sonidos de  
87 los insectos tienen un alto potencial como bioindicadores acústicos, especialmente a escala local,  
88 debido a su sensibilidad al cambio ambiental (McGeoch, 2007; Jeliakov et al., 2016; Riede,  
89 2018). Dentro de los insectos, los grillos y las esperanzas (Orthoptera: Ensifera) son algunos de  
90 los contribuyentes acústicos más importantes de los paisajes sonoros. Producen sonidos frotando  
91 unas estructuras especializadas de sus alas, un comportamiento denominado estridulación elitral  
92 (Baker & Chesmore, 2020). Entre los distintos tipos de llamados estridulatorios, el "canto de  
93 llamada" es utilizado por los machos para atraer al sexo opuesto (Grimaldi & Engel, 2005;  
94 Buellesbach, Cash & Schmitt, 2018). Los cantos de llamado son los más comunes en los paisajes  
95 sonoros naturales, y se utilizan a menudo en los estudios taxonómicos y evolutivos (Tan et al.,  
96 2021) debido a sus características estereotipadas y a su gran especificidad especie específica.  
97 (Grimaldi & Engel, 2005). Sin embargo, pocos estudios de ecoacústica incluyen una resolución  
98 taxonómica detallada de ortópteros u otros insectos (Diwakar & Balakrishnan, 2007a; Gasc et al.,  
99 2018) y muchos enfoques a escala de comunidad se enfocan más en vertebrados carismáticos  
100 como aves (Tobias et al., 2014), anuros (Villanueva-Rivera, 2014) o mamíferos (Heinicke et al.,  
101 2015). Si hablamos de estudios a escala de comunidad, el asignar las especies acústicas a las  
102 taxonómicas ayudará a desvelar la estructura y el cambio de las comunidades biológicas en  
103 espacio y tiempo (Chhaya et al., 2021).

104

105 A nivel de comunidad, los cambios en los patrones de actividad acústica pueden explicarse por la  
106 influencia de un conjunto de factores bióticos y abióticos (Chhaya et al., 2021). Las  
107 explicaciones de cómo los factores bióticos influyen en los patrones acústicos han sido  
108 formalizadas por varias teorías (Farina, 2014). Entre ellas por ejemplo, la hipótesis del nicho  
109 acústico afirma que los animales responden a otros emisores al particionar su actividad acústica  
110 (Krause, 1993) para evitar el enmascaramiento acústico (o solapamiento) en tiempo, frecuencia  
111 espectral y espacio; optimizando así la transmisión de la señal (Schmidt, Römer y Riede, 2013).  
112 Sin embargo, el solapamiento temporal es habitual en los ensamblajes de ortópteros tropicales,  
113 especialmente durante el coro del atardecer (Riede, 1996; Jain et al., 2014). La tendencia de los  
114 animales de diferentes especies a concentrar su canto en la misma ventana temporal se ha  
115 denominado anteriormente agrupamiento o "clustering" en inglés (Tobias et al., 2014) y puede  
116 beneficiar a los emisores individuales al reducir los riesgos de depredación. (Jain et al., 2014;  
117 Farina & Ceraulo, 2017). Por otro lado, se sabe que los factores ambientales abióticos, como la  
118 temperatura, las precipitaciones o la luz de luna pueden predecir los patrones acústicos de las  
119 comunidades de vertebrados (Bruni, Mennill & Foote, 2014; Pérez-Granados, Schuchmann &  
120 Marques, 2022), así como en las de insectos (Lang et al., 2006; Franklin et al., 2009). La  
121 actividad acústica puede ser una descripción muy útil de los patrones circadianos y estacionales

122 (Aide et al., 2013), y de las respuestas de las especies a las variables ambientales (Pérez-  
123 Granados, Schuchmann & Marques, 2022).

124

125 La mayoría de los estudios a escala de comunidad recogen la información ambiental a nivel  
126 local, midiendo las variables directamente en campo, o recopilándola de las estaciones  
127 meteorológicas locales (Ospina et al., 2013). Sin embargo, la información ambiental de campo  
128 podría ser difícil o incluso imposible de obtener en algunas circunstancias. Por ejemplo, debido a  
129 la escasez o ausencia de estaciones meteorológicas en algunas áreas, la ubicación remota de los  
130 sitios de estudio, o las limitaciones de financiación. La teledetección por satélite podría ser una  
131 alternativa en estos casos, ya que es exhaustiva espaciotemporalmente, a pesar de su menor  
132 resolución. Los datos recogidos mediante teledetección por satélite han sido útiles para estudios  
133 ecológicos a nivel de paisaje o de hábitat (Pettorelli et al., 2014; Pasetto et al., 2018) pero su  
134 potencial para preguntas a escala de comunidad, como la relación con la actividad acústica, sigue  
135 sin explorarse.

136

137 En este trabajo caracterizamos la actividad acústica de un ensamblaje de ortópteros, midiendo la  
138 ocurrencia de eventos de canto por unidad de tiempo y el nivel de solapamiento interespecífico  
139 en el rango temporal y de frecuencia. En principio esperamos encontrar un grupo de especies  
140 cantantes durante el crepúsculo (coro del crepúsculo), pero ninguna especie que se solapara en  
141 las tres dimensiones (tiempo, frecuencia y espacio) con otra. También decidimos explorar la  
142 implementación de datos de teledetección satelital de variables ambientales (temperatura  
143 superficial, precipitación diaria) junto con la fracción iluminada de la luna calculada  
144 astronómicamente, para describir su efecto especie específico en la actividad acústica de un  
145 ensamblaje de ortópteros en los Andes tropicales de Colombia. Adicionalmente, grabamos y  
146 recolectamos los insectos (incluyendo algunas especies nuevas para la ciencia que están siendo  
147 descritas) para identificar los sonotipos a nivel taxonómico de especie (cuando posible). Este  
148 trabajo sirve como una base importante para futuros protocolos de monitoreo acústico de  
149 insectos mediante la identificación de bioindicadores acústicos y el uso de datos de teledetección  
150 como una fuente de información alternativa para estudios localizados de ecología de  
151 comunidades.

152

## 153 **Materiales y métodos**

154

### 155 *Lugar del estudio y muestreo acústico*

156 Muestreamos el paisaje sonoro en la Reserva Natural Los Tucanes, ubicada en Gachantivá,  
157 Boyacá, Andes Orientales de Colombia (5.789, -73.550; 2300 ± 25msnm). Esta reserva privada  
158 incluye un área de 0,16 km<sup>2</sup> de bosque subandino dominado por roble andino (*Quercus*  
159 *humboldtii*) en diferentes estados de regeneración, con una temperatura anual de 15°C. La  
160 precipitación anual es de unos 1450 mm, en dos épocas de lluvia: de marzo a mayo y de octubre  
161 a noviembre (Climate-Data.org, 2019). Es mayoritariamente un bosque secundario de 20 años de

162 edad con pastizales de sucesión temprana tras el abandono agrícola. Utilizamos los datos de  
163 monitoreo acústico de una grabadora Audiomoth 1.0.0 desplegada a 1,5m del suelo, a una tasa de  
164 muestreo de 48kHz y resolución de 16 bits, configurada para grabar 1 minuto cada 30 minutos  
165 durante la temporada de lluvias, de marzo a mayo de 2020 (Tovar García & Acevedo-Charry,  
166 2021).

167

168 El conjunto de grabaciones (n=2851) se normalizó a -3dB y se subió a la plataforma en línea  
169 ARBIMON de Rainforest Connection-RFCx ([arbimon.rfcx.org](http://arbimon.rfcx.org))(información de descarga  
170 disponible en Supplemental Data 11). A partir de ahí, exploramos manualmente una submuestra  
171 de grabaciones (Supplemental Table S1, training set size) para anotar la presencia o ausencia de  
172 las especies acústicas observadas consistentemente a lo largo de los días. Definimos los  
173 sonotipos antes de identificar las especies taxonómicas (véase más adelante) que se utilizaron  
174 durante el análisis de los datos. Otros sonotipos con actividad acústica esporádica no se  
175 consideraron en los análisis, dada la dificultad de entrenar modelos de detección a partir de muy  
176 pocas grabaciones anotadas. Después entrenamos modelos de reconocimiento automático de  
177 bosques aleatorios (Supplemental Data S1, S2, S4, S6) y de “pattern matching” (o coincidencia  
178 de patrones) (Supplemental Data S3, S5, S7) utilizando las herramientas integradas de RFCx  
179 ARBIMON para cada sonotipo, con las grabaciones anotadas como conjunto de datos de  
180 entrenamiento (Supplemental Table 1) con el fin de detectar las ocurrencias de los sonotipos para  
181 cada grabación. Determinamos que el rendimiento de los modelos de coincidencia de patrones  
182 fue mejor para las esperanzas, mientras que los modelos de bosques aleatorios fueron  
183 significativamente mejores para los grillos, según nuestras pruebas preliminares. Una  
184 comparación detallada del rendimiento entre los modelos de detección disponibles (incluidos  
185 aquellos dirigidos a otros grupos animales) para las especies de ortópteros es un tema interesante  
186 para abordar en estudios futuros, más cuando ahora contamos con nuevas herramientas  
187 prometedoras (por ejemplo, Lapp et al., 2021; Steinfath et al., 2021). Los resultados de los  
188 modelos se revisaron manualmente, se descartaron los falsos positivos y se calculó la precisión  
189 de la detección como se sugiere en Aide et al. (2013). Todos los modelos de detección  
190 presentaron una precisión superior al 70% (Supplemental Table S2). Después de la post  
191 validación, la salida del modelo fue una matriz de presencias/ausencias por grabación para el  
192 conjunto completo. Definimos la actividad acústica como las ocurrencias detectadas por unidad  
193 de tiempo: horas y días (Aide et al., 2013). Partiendo de la actividad acústica (ocurrencias) por  
194 hora, describimos la actividad diaria promedio por especie, y medimos la partición temporal  
195 entre pares de especies usando el método de solapamiento de densidades de kernel, que es un  
196 coeficiente que refleja el grado de solapamiento entre los patrones de actividad como medida de  
197 similitud (Ridout & Linkie, 2009). Además, utilizamos la actividad acústica por día para ajustar  
198 modelos de respuesta a variables ambientales teledetectadas por satélite (véase más adelante).

199

200 Para asignar los sonotipos con su identidad taxonómica, recogimos ejemplares en el campo y  
201 realizamos la delimitación taxonómica buscando activamente los emisores de cada señal de los

202 sonotipos seleccionados (los activos consistentemente en el conjunto de datos PAM) durante dos  
203 salidas de campo, en septiembre y octubre de 2020. Durante estas salidas de campo se realizaron  
204 observaciones del microhábitat (altura) y del comportamiento de canto. Los especímenes  
205 recolectados fueron depositados en la colección entomológica del Instituto Humboldt (IAvH-E)  
206 en Villa de Leyva (Boyacá) siguiendo las pautas para especímenes extendidos (Acevedo-Charry  
207 et al., 2021) con un voucher genético (pata delantera) también depositado en la colección de  
208 tejidos del Instituto Humboldt en Palmira (Valle del Cauca, Colombia). Los especímenes fueron  
209 identificados a la mayor resolución taxonómica posible. No pudimos recolectar especímenes de  
210 algunas especies (habitantes del dosel), por lo que asignamos un nombre temporal de sonotipo  
211 (por ejemplo, "Flutist") a la señal acústica (Aide et al., 2017; Ferreira et al., 2018). Además,  
212 realizamos grabaciones de algunos individuos en cautiverio (especies: Katydid1, Katydid3,  
213 Katydid4) o directamente en el campo (Katydid5) con una grabadora Audiomoth 1.0.0 a una  
214 frecuencia de muestreo de 384 kHz y una resolución de 16 bits. Las grabaciones de referencia  
215 para otras especies (Cricket1, Cricket2 y Katydid2) se realizaron en campo con un micrófono  
216 shotgun Sennheiser ME67 conectado a una grabadora SoundDevice Mix Pre 3 de primera  
217 generación. Las grabaciones de referencia se depositaron en la Colección de Sonidos  
218 Ambientales *Mauricio Álvarez-Rebolledo* del Instituto Humboldt (IAvH-CSA-18783 a IAvH-  
219 CSA-18805).

220

#### 221 *Variables ambientales a partir de datos de teledetección*

222 En las fechas de detección a lo largo de nuestro tiempo de estudio, evaluamos la relación de la  
223 actividad acústica por día de cada especie con la temperatura local y la precipitación detectada  
224 por satélite, y la luz de la luna calculada astronómicamente. Extrajimos las series temporales del  
225 píxel superpuesto al punto de muestreo a partir de archivos ráster generados diariamente  
226 utilizando el software Quantum GIS (Equipo de desarrollo de QGIS, 2022). La temperatura se  
227 obtuvo a partir de un conjunto de datos de 1 km de resolución utilizando el parámetro de  
228 temperatura de superficie terrestre ("Land Surface Temperature", LST) generado con los  
229 productos LST de espectrorradiómetro de imágenes de resolución moderada (MODIS en inglés)  
230 (Zhang et al., 2021, 2022); este conjunto de datos incluye una medición a las 01:00 y otra a las  
231 13:00 horas, que equivale a la temperatura mínima y máxima diaria. Por otro lado, los valores de  
232 precipitación se obtuvieron a partir de un conjunto de datos de 10 km de resolución estimados  
233 mediante el Integrated Multi-satellitE Retrievals for Global Precipitation Measurement (IMERG)  
234 (Huffman et al., 2022). Los datos ambientales utilizados para el análisis se proporcionan en  
235 Supplemental Data S8. Análisis preliminares mostraron una alta correlación con la estación  
236 meteorológica nacional más cercana en Santa Sofía, Boyacá (a 10 km de distancia de nuestro  
237 sitio de estudio) pero los datos de IMERG incluyen valores más estables (es decir, sin  
238 mediciones faltantes en algunos días, como tenía Santa Sofía). Por último, la fracción iluminada  
239 de la luna se obtuvo a través de la función *getMoonIllumination* del paquete R *suncalc* para las  
240 coordenadas de nuestro sitio de muestreo (Thieurmel & Elmarhraoui, 2019).

241

242 *Análisis de datos*

243 Para las variables temporales, se analizó la actividad acústica diaria de cada especie utilizando el  
244 paquete *overlap* en R (Ridout & Linkie, 2009). Primero, generamos una distribución de densidad  
245 del kernel de von Mises, de la actividad acústica diaria por cada especie durante el periodo  
246 completo de muestreo (marzo a abril), dado que los patrones de actividad acústica diaria  
247 corresponden a una distribución circular. A continuación, calculamos el coeficiente delta ( $\hat{\Delta}_4$ ) de  
248 solapamiento entre cada par de especies, tal y como se recomienda para muestras mayores a 75  
249 (Ridout & Linkie, 2009) con el valor de suavizado por defecto. Los intervalos de confianza se  
250 calcularon utilizando un bootstrap suavizado con 10.000 muestras, ajustado para sesgo (Ridout &  
251 Linkie, 2009).

252

253 Las variables espectrales, es decir, la frecuencia dominante (frecuencia con la mayor energía), el  
254 ancho de banda de frecuencia desde la mínima (-5dB por debajo de la frecuencia dominante) a la  
255 máxima (+5dB por encima de la frecuencia dominante), se midieron manualmente en la ventana  
256 de análisis FFT (ventana Hamming, 256 muestras) del software *ocenaudio* (Equipo de  
257 *ocenaudio*, 2015) para el armónico dominante de dieciocho sílabas de canto, como se define en  
258 (Baker & Chesmore, 2020) para las especies de eperanzas, y dieciocho segmentos de 1s para las  
259 especies de grillos. Los segmentos se seleccionaron de las grabaciones con menos ruido del  
260 conjunto de datos PAM para cada especie (Supplemental Data S10). No se midieron los  
261 armónicos adicionales debido a que la grabadora no los detectó constantemente por la atenuación  
262 (Romer & Lewald, 1992; Hung & Prestwich, 2004). Para evaluar el solapamiento de frecuencias,  
263 contrastamos las mediciones (frecuencias mínimas, máximas y dominantes) para cada especie al  
264 remuestrear aleatoriamente las mediciones por 10.000 iteraciones. Cada iteración por especie y  
265 medición incluye un valor promedio e intervalos de confianza del 95% de los datos  
266 (Supplemental Table S3).

267

268 Exploramos la relación de la proporción de detecciones de cada especie por día con las cuatro  
269 variables continuas de teledetección mediante una regresión beta, utilizando el paquete *betareg*  
270 en R (Cribari-Neto & Zeileis, 2010). Asumimos una distribución beta porque los valores son  
271 continuos y limitados entre 0 y 1 (Bolker, 2007), escalamos las ocurrencias con la fórmula  
272  $Detecciones_{(b)} = [Detecciones_{(a)} * (N - 1) + 0,5]/N$ , donde  $N$  es el tamaño de la muestra y  
273  $Detecciones_{(b)}$  es nuestra variable respuesta para la regresión beta (Smithson & Verkuilen, 2006).  
274 Para seleccionar la variable que mejor se ajusta a la variable de respuesta (proporción de  
275 detecciones) para cada especie, escalamos las variables predictoras (temperatura mínima y  
276 máxima, precipitación y fracción lunar) centrando alrededor de la media y dividiendo por dos  
277 desviaciones estándar (Schielzeth, 2010). Para cada especie, comparamos 16 modelos aditivos  
278 con diferentes combinaciones de variables predictoras, incluyendo un modelo nulo.  
279 Identificamos el modelo mejor clasificado con mayor frecuencia ( $\pi_i$ ) basado en el criterio de  
280 información delta de Akaike ( $\Delta AIC$ ) y el peso de Akaike ( $w_i$ ) tras un remuestreo de 10.000  
281 veces. Para una mejor estimación del modelo mejor clasificado, en cada remuestreo

282 seleccionamos aleatoriamente sólo 50 de los 61 días de grabaciones y estimamos el porcentaje de  
283 veces que se seleccionó cada modelo mejor clasificado ( $\pi_i$ ) (Supplemental Data S9). Los análisis  
284 fueron conducidos en R, y nuestro código y datos están disponibles en la red  
285 (<https://github.com/diegryllid>).

286

## 287 **Resultados**

288 Nos centramos en siete especies identificadas de ortópteros para nuestro análisis del ensamblaje  
289 acústico. Dos especies de grillos (superfamilia Grylloidea): "Flutist" (Cricket1) y Podoscirtinae  
290 (Cricket2) y cinco esperanzas (familia Tettigoniidae): *Copiphora colombiae* (Katydid1),  
291 *Neoconocephalus brachypterus* (Katydid3), Cocconotini (gen. nov.) (Katydid4), "Sprinkler"  
292 (Katydid2), y "Rattler" (Katydid5). Aunque no se cubrieron todas las especies del ensamblaje  
293 acústico, estas siete especies fueron las más representativas en términos de actividad acústica (las  
294 que se detectaron la mayoría de los días) a lo largo del periodo de muestreo, tal y como se  
295 definió tras la anotación manual de las grabaciones.

296

297 *Comportamiento de canto de los machos, partición de microhábitats y cantos del ensamblaje*

298

299 Detectamos las especies que habitan en diferentes microhábitats por sonotipo *in situ*. En la parte  
300 superior del bosque, detectamos a los habitantes del dosel (Cricket1, Katydid2, Katydid5). En el  
301 estrato medio, entre los arbustos y las ramas bajas de los árboles (<4m), detectamos a  
302 Podoscirtinae (Cricket2). De manera similar, detectamos a Cocconotini gen. nov. (Katydid4) en  
303 alturas de ~4m como máximo. Por último, detectamos a Katydid1 y Katydid3 en zonas más  
304 abiertas y en arbustos de sucesión temprana. *Copiphora colombiae* (Katydid1) canta desde  
305 debajo de las hojas o en la parte superior de los tallos de los arbustos del sotobosque a unos 2 m  
306 de altura, mientras que *N. brachypterus* (Katydid3) siempre canta desde macollas de pasto, y  
307 muy cerca del suelo (0,5-1m). Las alturas aquí referidas son estimaciones visuales, por lo que  
308 recomendamos la medición directa de las alturas de los individuos para una descripción detallada  
309 de la distribución espacial en los estratos del bosque. También detectamos dos comportamientos  
310 principales de canto. El primero fue un comportamiento de canto críptico, que consiste en cantar  
311 a oculto, observado en dos especies (Cricket2 y Katydid4). La especie de grillo Podoscirtinae  
312 (Cricket2) siempre canta desde el interior de hojas de roble enrolladas, mientras que la especie de  
313 katydid Cocconotini gen. nov. (Katydid4) canta desde su propia madriguera tallada en troncos de  
314 árboles (Cadena-Castañeda, Gómez-Morales, Acevedo-Charry, Benavides-López, *Manuscrito no*  
315 *publicado*). El segundo comportamiento fue el canto expuesto, que consiste en llamar desde lo  
316 alto de las hojas y ramas, observado en dos especies de esperanzas: *C. colombiae* (Katydid1) y  
317 *N. brachypterus* (Katydid3). No pudimos observar el comportamiento de canto en los habitantes  
318 del dosel (Cricket1, Katydid2, Katydid5).

319

320 *Actividad acústica diaria*



321 La actividad acústica diurna varió a lo largo de la noche, reflejando dos estrategias. Todas las  
322 esperanzas tienen una estrategia de canto completamente nocturna (Katydid1, Katydid2,  
323 Katydid3, Katydid4, Katydid5), aunque "Rattler" (Katydid5) mostró unas pocas detecciones  
324 durante el día (Supplemental data S7). Estas cinco especies comienzan a cantar al anochecer  
325 (~17:30 hrs); más adelante, tres especies muestran una mayor densidad de detecciones en  
326 momentos específicos de la noche (Katydid1: ~20:30, Katydid2: ~01:30, Katydid3: ~20:00)  
327 que se pueden observar como el pico de densidad de actividad acústica (Fig. 1). Es importante  
328 señalar que estas tres especies siguen activas durante toda la noche, y sus picos de actividad son  
329 sutiles (menos de 0,1 de diferencia en la densidad de actividad acústica, si se compara con la  
330 media del resto de horas de actividad). Las dos esperanzas restantes (Katydid4, Katydid5)  
331 mostraron una actividad acústica relativamente constante durante toda la noche y una  
332 disminución más rápida de la actividad desde las 04:00 hasta el amanecer (~06:00). Por otra  
333 parte, ambos grillos tienen un horario crepuscular. Podoscirtinae (Cricket2) mostró un horario de  
334 canto mucho más restringido, desde las 18:00 hasta las 19:00 con una disminución muy brusca  
335 de la actividad. "Flutist" (Cricket1) mostró una disminución más lenta de la actividad,  
336 manteniendo un número considerable de detecciones después de las ~21:00. En general,  
337 identificamos un momento del coro en el que todos los miembros del ensamblaje cantan al  
338 mismo tiempo, desde las 18:00 hasta las 20:00 (Fig. 1).

339

#### 340 *Solapamiento de actividad diaria, y espectral*

341 El análisis por pares de la distribución de la densidad de las especies mostró dos tendencias de  
342 solapamiento (Tabla 1). Los grillos tienen menos probabilidad de solaparse con los horarios de  
343 canto de las esperanzas (valores de coeficiente bajos <0,6). De ellos, Podoscirtinae (Cricket2) es  
344 el más especializado, con un horario de canto muy corto (Fig. 1). Por el contrario, las esperanzas  
345 se solapan entre sí en sus periodos de canto (valores de coeficiente altos >0,6).

346

347 La frecuencia dominante media fue considerablemente menor para los grillos y mayor para las  
348 esperanzas. Mientras que el ancho de banda de los grillos es angosto, el ancho de banda de las  
349 esperanzas varió entre las especies, y mostró solapamiento espectral en cuatro especies (Fig. 2).  
350 Las especies que utilizaron una mayor frecuencia de canto también incluyeron un mayor ancho  
351 de banda (Katydid5, Katydid4, Katydid3), y solapamiento entre ellas. La especie con mayor  
352 ancho de banda, *N. brachypterus* (Katydid3), se solapó además con una especie habitante del  
353 dosel, Katydid2, que tiene un ancho de banda de frecuencia menor. Aunque la mayoría de las  
354 especies tienen componentes armónicos en su canto de llamado (todas excepto Cricket1), como  
355 se observó en las grabaciones direccionales (Fig. 2a) con armónicos ultrasónicos en todas las  
356 esperanzas excepto Katydid2. (Romer y Lewald, 1992; Hung y Prestwich, 2004). Los armónicos  
357 ultrasónicos no se registraron ni analizaron debido a la tasa de muestreo utilizada en nuestra  
358 configuración PAM; tampoco se analizaron los armónicos audibles distintos del armónico  
359 dominante (el armónico de mayor amplitud), ya que su menor amplitud los hizo indetectables en  
360 las grabaciones PAM.

361

## 362 *Respuesta de la actividad acústica a las variables ambientales*

363 La respuesta de la actividad acústica varió según las especies y las variables ambientales  
364 obtenidas por teledetección (Fig. 3, Tabla 2). La actividad acústica de las especies de esperanzas  
365 presentó una relación negativa con la fracción lunar para Katydid1 ( $\beta = -0,28$ ,  $p = 0,003$ ),  
366 Katydid2 ( $\beta = -0,34$ ,  $p < 0,001$ ), Katydid3 ( $\beta = -0,36$ ,  $p < 0,001$ ), Katydid4 ( $\beta = -0,13$ ,  $p <$   
367  $0,001$ ), y Katydid5 ( $\beta = -0,07$ ,  $p = 0,02$ ). Las dos especies de grillos mostraron una relación  
368 negativa sólo con la precipitación (Cricket1:  $\beta = -0,31$ ,  $p = 0,006$ ; Cricket2:  $\beta = -0,32$ ,  $p = 0,002$ )  
369 mientras que en las esperanzas la respuesta fue más compleja. Además de con las especies de  
370 grillos, la precipitación también estuvo fuertemente relacionada de forma negativa con las  
371 actividades acústicas de Katydid1 ( $\beta = -0,25$ ,  $p = 0,02$ ), y Katydid5 ( $\beta = -0,06$ ,  $p = 0,05$ ) en  
372 menor medida. La temperatura mínima mostró una tendencia positiva tanto para Katydid1 ( $\beta =$   
373  $0,26$ ,  $p = 0,007$ ) como para Katydid2 ( $\beta = 0,21$ ,  $p = 0,04$ ), y la temperatura máxima estuvo  
374 significativamente relacionada de forma negativa sólo para Katydid5 ( $\beta = -0,07$ ,  $p = 0,03$ ). En  
375 términos generales, la precipitación diaria explica mejor la actividad acústica de los grillos,  
376 mientras que la fracción lunar explica mejor actividad acústica de las esperanzas.

377

## 378 **Discusión**

379

380 A pesar de que la actividad acústica de los insectos impulsa los paisajes sonoros de los  
381 ecosistemas tropicales (Aide et al., 2017), rara vez se identifican con una resolución taxonómica  
382 precisa en los estudios ecoacústicos. Utilizamos la huella de señalización acústica de diferentes  
383 especies a partir de un muestreo acústico pasivo para caracterizar un ensamblaje de ortópteros.  
384 Con el patrón de actividad acústica diaria de cada sonotipo, pudimos muestrear las especies  
385 prioritarias y asignar especie taxonómica a cuatro de siete especies. A pesar de las recientes  
386 contribuciones al trabajo taxonómico del grupo para Colombia (Cadena-Castañeda et al., 2020,  
387 2021) e investigaciones relevantes sobre la producción y recepción de sonidos (Baker et al.,  
388 2019; Celiker, Jonsson y Montealegre-Z, 2020), encontramos novedades taxonómicas en esta  
389 comunidad (Cadena-Castañeda, Gómez-Morales, Acevedo-Charry, Benavides-López,  
390 *Manuscrito sin publicar*). Además, exploramos la relación de la actividad acústica de cada  
391 especie con las variables ambientales provenientes de teledetección por satélite. Sin embargo  
392 experimentamos dificultades en la recolección de los habitantes del dosel, para lo cual  
393 recomendamos el uso de métodos especializados como la nebulización (Montealegre-Z et al.,  
394 2014), trampas de luz (por ejemplo, Symes et al., 2021) o la localización manual especializada  
395 (Diwakar & Balakrishnan, 2007b) para futuros estudios. Dado que los estudios sobre los efectos  
396 del medio ambiente en las comunidades acústicas de insectos son todavía escasos, nuestro  
397 estudio es un precedente importante, y sirve como un buen ejemplo de cómo los datos de  
398 teledetección por satélite pueden ser utilizados junto con esquemas de monitoreo acústico en  
399 áreas con poco acceso a métodos de medición ambiental local, como las estaciones  
400 meteorológicas.

401

402 *Especies audibles representativas*

403 Las especies en las que nos enfocamos representan los ortópteros nocturnos audibles más  
404 comunes en el lugar de muestreo. Este enfoque centrado en las especies conspicuas de baja  
405 frecuencia (espectro audible) tiene tanto beneficios como desafíos. Al centrarnos en las especies  
406 más comunes: Por un lado, pudimos describir la identidad de los sonotipos del ensamblaje, así  
407 como la tendencia general de los comportamientos de canto que dominan la comunidad. Sin  
408 embargo, se dejaron de lado otras especies que son raras o indetectables por nuestros métodos.  
409 Las especies diurnas (saltamontes en su mayoría), por ejemplo, tuvieron una detectabilidad  
410 relativamente baja en nuestro conjunto de datos, siendo apenas detectables, lo que confirma las  
411 observaciones anteriores para el grupo en los bosques tropicales (Diwakar & Balakrishnan,  
412 2007a). Para estudios cuyo objetivo sea describir ampliamente una comunidad acústica, o  
413 analizar las interacciones detalladas entre especies, recomendamos utilizar un muestreo más  
414 amplio tanto en espacio (más unidades de grabación) como en tiempo (períodos de monitoreo  
415 más largos) en conjunto con una anotación más intensiva de las grabaciones. Por ejemplo, al  
416 muestrear en frecuencias ultrasónicas para una adecuada detección de algunas especies de  
417 esperanzas neotropicales. El uso de múltiples unidades de grabación también puede mejorar la  
418 detectabilidad de especies de canto de baja amplitud, que pueden haber sido infra detectadas en  
419 nuestro estudio. A pesar de ello, y dada su alta actividad y detectabilidad, combinada con nuestra  
420 capacidad para asignar la resolución taxonómica de la mayoría de las especies; consideramos que  
421 las especies representativas aquí consideradas son adecuadas y suficientes para analizar las  
422 relaciones de especies individuales con factores ambientales, con propósitos de monitoreo  
423 ecoacústico. Por tanto, recomendamos este enfoque de priorización de especies para estudios  
424 ambientales con limitaciones metodológicas o temporales.

425

426 *Solapamiento temporal y espectral*

427 Observamos que cuanto más alta es la frecuencia dominante del canto de llamado (Fig. 2), más  
428 amplio parece ser el rango de actividad acústica diurna (Fig. 1; Figura Suplementaria 1). Sin  
429 embargo, este patrón debe ser estudiado en detalle en futuras investigaciones, con énfasis en los  
430 mecanismos subyacentes y contemplando la competencia interespecífica, las limitaciones  
431 morfológicas, y/o las relaciones depredador-presa. Mientras que las especies de grillos mostraron  
432 llamados de baja frecuencia, agrupados estrechamente en el crepúsculo (Fig. 1, línea punteada),  
433 las esperanzas dispersaron sus llamados a lo largo de la noche. Además, las esperanzas con  
434 cantos de mediana frecuencia (Fig. 1, líneas discontinuas; Katydid1, Katydid2, Katydid3)  
435 mostraron claros picos de actividad, mientras que las de cantos de alta frecuencia (Fig. 1, líneas  
436 sólidas; Katydid4, Katydid5) mantuvieron niveles de actividad constantes durante toda la noche.  
437 En estudios anteriores se encontró una relación negativa entre la duración de la señal de llamado  
438 y la tasa de señalización diaria en esperanzas neotropicales como resultado de compromisos  
439 (“trade-off’s” en inglés) acústicos (Symes et al., 2021), nuestros datos sugieren que también  
440 podría existir una relación positiva entre la frecuencia dominante y la actividad acústica diaria.

441 Además, a pesar de que no medimos el tamaño del cuerpo o el tamaño específico y las  
442 propiedades de las estructuras sonoras productoras de las especies de nuestro ensamblaje, los  
443 grillos eran en general más pequeños que las especies de esperanzas, por lo que nuestra  
444 observación podría ser contraria a las predicciones de la hipótesis de adaptación morfológica  
445 (Farina, 2014), demostrada anteriormente en aves (Wallschläger, 1980), mamíferos (Fletcher,  
446 2004), y ranas (Boeckle, Preininger y Hödl, 2009). Dicha hipótesis podría no ser siquiera  
447 aplicable a los ortópteros, dado que su forma de producir sonidos (estrídulación elítral) es  
448 completamente diferente. Por ejemplo, Godthi et al. (2022) encontraron una relación entre el  
449 tamaño y las propiedades del aparato estrídulatorio con la frecuencia acústica, independiente del  
450 tamaño del cuerpo. Un examen más detallado de nuestros especímenes voucher en el IAVH-E  
451 podría ser útil para probar las hipótesis morfológicas. Por último, estudios anteriores han  
452 demostrado que los depredadores nocturnos, como los murciélagos, escuchan y seleccionan a sus  
453 presas basándose en ciertas propiedades de la señal, incluyendo la frecuencia dominante, y la  
454 exposición varía entre las especies presentes en una comunidad (Falk et al., 2015). Entonces, en  
455 este caso, las especies de menor frecuencia de pico en este ensamblaje podrían estar bajo  
456 mayores presiones de depredación, y responder concentrando su canto en períodos de tiempo  
457 más cortos para disminuir ese riesgo (Farina & Ceraulo, 2017). Mas estudios experimentales  
458 sobre la agrupación de la actividad acústica como respuesta a predación en insectos son  
459 necesarios.

460

461 Además de la agregación en el tiempo, existe una clara preferencia por las horas del crepúsculo  
462 por parte de los grillos, que puede explicarse porque es el momento del día en el que los  
463 depredadores diurnos ya están bajando su actividad, mientras que los depredadores nocturnos  
464 aún no están en su pico (Jain et al., 2014). Además, es el momento en el que todas las especies  
465 de esperanzas inician su actividad también, por lo que el canto interespecífico simultáneo puede  
466 reducir el riesgo individual al "confundir" al depredador que ahora tiene muchas opciones  
467 disponibles (Farina & Ceraulo, 2017). Anteriormente nos referimos a este período como el "coro  
468 del crepúsculo", y muchos otros factores pueden estar influyendo en este fenómeno. Además, el  
469 solapamiento temporal relativamente alto de las esperanzas (Tabla 1; Fig. 1) sugiere que las  
470 esperanzas también están agregando su actividad acústica en el tiempo, sólo que de una manera  
471 diferente: concentrando su actividad más tarde y extendiéndola durante toda la noche. Mantener  
472 un canto continuo, pero prolongando su emisión durante varias horas también tiene sus  
473 inconvenientes. Estos requieren adaptaciones en respuesta a los depredadores visuales, como se  
474 discutirá más adelante. En trabajos anteriores se ha descrito cómo la agregación espacial de  
475 esperanzas puede disminuir la eficacia de las capturas por parte de murciélagos (Prakash et al.,  
476 2021). Aunque no medimos la relación entre la frecuencia acústica y la duración de la actividad  
477 de llamada diurna, nuestro análisis preliminar parece sugerir que las especies con frecuencias  
478 dominantes más bajas tienden a llamar durante períodos más cortos (por ejemplo, Cricket1 vs  
479 Katydid5; Figura Suplementaria 1), y viceversa. Para confirmar esta "relación frecuencia-  
480 actividad acústica" se requieren trabajos que incluyan más taxones y lugares de muestreo, y que

481 tengan en cuenta los mecanismos que subyacen al coro del crepúsculo junto con las interacciones  
482 acústicas con los depredadores. Adicionalmente, no tuvimos en cuenta las limitaciones  
483 filogenéticas o evolutivas al contrastar estos dos grupos de insectos con limitantes muy distintos  
484 en la frecuencia de sus cantos, dejando abierto ese tema de investigación para entender mejor el  
485 ensamblaje acústico de los ortópteros.

486

487 Aunque cuatro especies muestran un solapamiento espectral (Fig. 2), éstas podrían tener  
488 diferentes preferencias de microhábitat: Katydid2 parece habitar en el dosel, mientras que  
489 Katydid3 se encontró siempre en trozos de hierba a nivel del suelo. Aunque las observaciones de  
490 microhábitat se basan en un muestreo oportunista, nuestros resultados proporcionan una  
491 aproximación para intentar comprender el solapamiento espectral y temporal de algunas  
492 especies. Las especies Katydid4 y Katydid5, que se solapan tanto en tiempo como en frecuencia,  
493 habitan el sotobosque y el dosel respectivamente; y pueden estar evitando el enmascaramiento  
494 por la atenuación diferencial a diferentes alturas (Ellinger & Hödl, 2003). Sin embargo, otros  
495 estudios han encontrado pruebas contradictorias (Jain & Balakrishnan, 2012). Es necesario seguir  
496 investigando para comprobar esta hipótesis, ya que el efecto de la estratificación del bosque  
497 sobre la interferencia de las señales en los insectos sigue sin estar claro (Schmidt & Balakrishnan,  
498 2015). Además, la medición de características acústicas temporales de menor escala podría  
499 ayudar a confirmar si se está evadiendo el enmascaramiento temporal a escalas más pequeñas  
500 (Symes et al., 2021), ya que las frecuencias de pulsos, y la duración de las sílabas de los  
501 Katydid4 y Katydid5 parecen ser muy diferentes.

502

### 503 *Efectos de los factores ambientales y datos de teledetección*

504 Las especies de esperanzas disminuyen su actividad acústica entre 0,70 y 0,93 veces con un  
505 aumento de una unidad de la fracción lunar iluminada (desde luna nueva en 0,0 hasta luna llena  
506 en 1,0). La relación negativa encontrada entre la fracción lunar y la actividad acústica de las  
507 especies de esperanzas (Tabla 1, Fig. 3) corrobora los hallazgos de estudios anteriores. Por  
508 ejemplo, mayor luz lunar llevó a una respuesta de evasión de los depredadores visuales, ya fuera  
509 disminuyendo su actividad general (Lang et al., 2006) o aumentando el uso de canales de  
510 comunicación alternativos, como la tremulación (Römer, Lang y Hartbauer, 2010) como parte  
511 del repertorio de adaptaciones de las esperanzas a la depredación por parte de murciélagos (ter  
512 Hofstede et al., 2017). La respuesta a la luz de luna es probablemente consecuencia de la ya  
513 mencionada agrupación de los cantos en un tiempo más amplio; en contraste con los grillos, que  
514 de hecho no mostraron ninguna relación con la luz de luna (Tabla 2), quizás porque durante el  
515 crepúsculo todavía hay suficiente luz solar, como para que la luz de la luna no marque ninguna  
516 diferencia.

517

518 En cuanto a la precipitación, un grillo y dos especies de esperanzas disminuyen su actividad  
519 acústica entre 0,73 y 0,94 veces con un aumento unitario de la precipitación (mm por día). Este  
520 efecto negativo expresándose principalmente sobre la actividad acústica de las dos especies de

521 grillos (Cricket1 y Cricket2; Fig. 3) confirma observaciones previas (Alexander & Meral, 1967) y  
522 las nuestras propias: siempre que llovía durante el coro crepuscular, los grillos a duras penas  
523 cantaban. Aunque el ruido de la lluvia puede haber afectado a la detectabilidad en los días de  
524 lluvia, nuestra revisión manual de las grabaciones y las observaciones en el campo nos dan  
525 confianza en que las detecciones del modelo reflejan la actividad acústica incluso durante los  
526 días de lluvia. Aun así, recomendamos el uso de modelos de detección acústica que tengan en  
527 cuenta la detección de lluvia, como forma de medir el impacto de la lluvia sobre la detección de  
528 ortópteros en futuros estudios. Las esperanzas no mostraron la misma relación con la  
529 precipitación diaria, excepto Katydid1 y Katydid5, que mostraron respuesta en conjunto a otras  
530 covariables. Sin embargo, algo que hay que tener en cuenta es que dado que el período de  
531 llamado de los grillos es más corto, tienen más posibilidades de ser interrumpidos por la lluvia  
532 como se ha observado en otras especies (Alexander & Meral, 1967; Franklin et al., 2009); a la  
533 vez que los intervalos de llamado más amplios de las esperanzas pueden haber mejorado su  
534 detectabilidad incluso después de breves períodos de lluvia durante la noche. Nuestra opinión es  
535 que la lluvia puede afectar al canto de los ortópteros a una escala temporal más fina en adición a  
536 los efectos diarios acumulados, a diferencia de en la luz de luna, dado que la precipitación diaria  
537 puede estar distribuida tanto forma extendida durante el día, como concentrada en períodos  
538 cortos. Además, otros factores externos como el viento (Velilla et al., 2020) o el ruido ultrasónico  
539 de fondo (Römer & Holderied, 2020) pueden afectar también al comportamiento de señalización  
540 de las especies de esperanzas. Una comparación directa de la precipitación medida localmente  
541 con datos de teledetección por satélite, y su efecto en la actividad acústica de una comunidad  
542 puede ser útil para confirmar esta relación.

543

544 El análisis de la temperatura sugiere una relación negativa (disminución de 0,93 veces por  
545 unidad de incremento) con la temperatura máxima diaria sólo para Katydid5, y una relación  
546 positiva con la temperatura mínima para Katydid1 (aumento de 1,30 veces por unidad de  
547 incremento) y Katydid2 (aumento de 1,23 por unidad de incremento de temperatura mínima).  
548 Las razones subyacentes de esta respuesta aún no se han explorado en detalle, pero el aumento  
549 de la señalización de las especies Katydid1 y Katydid2 concuerda con estudios anteriores en  
550 otras especies (Franklin et al., 2009) que encontraron un aumento de la señalización durante las  
551 noches más cálidas. Ya que la preferencia del microhábitat puede desempeñar un papel  
552 importante en la regulación de la temperatura, recomendamos también el uso de mediciones a  
553 escala local para seguir explorando la relación de la actividad de llamada con esta variable.

554

555 Aunque estudios anteriores han evaluado la precisión de los productos de teledetección satelital  
556 aquí utilizados (o similares) en estudios con aplicaciones ambientales (Ej, Palomino-Ángel,  
557 Anaya-Acevedo y Botero, 2019), o han revisado su potencial para la modelación de ecosistemas  
558 (Pasetto et al., 2018), e incluso en estudios PAM (Elise et al., 2022). Ninguno hasta donde  
559 sabemos, ha evaluado aún la aplicabilidad de datos de teledetección para responder preguntas de  
560 monitoreo en comunidades locales. Recomendamos comparar los datos de las estaciones

561 meteorológicas locales con los datos de teledetección por satélite, en el contexto de los  
562 programas de monitoreo biológico local para evaluar el alcance de la aplicabilidad de este  
563 enfoque.

564

## 565 **Conclusiones**

566 Los datos astronómicos de la luz de la luna y de la precipitación por teledetección satelital  
567 pueden explicar la actividad acústica de las esperanzas y los grillos en un ensamblaje de  
568 ortópteros, y su uso puede ser beneficioso para estudios con limitaciones geográficas, financieras  
569 o de otro tipo. Aun así, consideramos que es necesario un análisis más profundo que incluya  
570 múltiples puntos de muestreo antes de generalizar los patrones observados aquí, dada la pequeña  
571 escala temporal y espacial del presente estudio. Los efectos de los pequeños cambios en los  
572 factores ambientales sobre la actividad acústica de las especies observados en nuestro estudio  
573 sugieren que los ortópteros podrían ser un indicador clave del cambio ambiental. El modo en que  
574 esos cambios podrían extrapolarse a la estacionalidad anual y a otros niveles tróficos suponen un  
575 tema de estudio potencial que permitirá comprender mejor las comunidades acústicas de todo el  
576 mundo. Por último, el seguimiento acústico de los ortópteros tiene un gran potencial para las  
577 evaluaciones ambientales, además de ayudar a responder preguntas ecológicas, y enriquecer las  
578 descripciones taxonómicas de biotas poco estudiadas.

579

## 580 **Agradecimientos**

581 A nuestro difunto maestro Germán Amat García por su motivación y apoyo, esperamos haberle  
582 hecho sentir orgulloso. Agradecemos a Beatriz Salgado, Paula Caycedo, Oscar Cadena-  
583 Castañeda, y Jose Luis Benavides-López por contribuir con ideas y perspectivas en las primeras  
584 etapas de este proyecto y las colaboraciones en curso. Agradecemos a Rainforest Connection-  
585 RFCx por permitirnos utilizar la plataforma ARBIMON con fines académicos sin pago alguno  
586 en ese entonces. Recibimos la motivación para trabajar en la Reserva Natural Los Tucanes por  
587 parte de Fernando y Pablo Forero, y sus familias, así como de Zuania Colón-Piñeiro durante su  
588 tiempo de coordinación de las actividades de investigación en la reserva. Además, agradecemos  
589 los numerosos comentarios constructivos sobre el manuscrito de Zuania Colón-Piñeiro, Sarah  
590 McGrath-Blaser, Laurel Symes y otros dos revisores anónimos. También agradecemos a David  
591 Gray por sus comentarios adicionales y por alentar esta presentación. Los datos de precipitación  
592 utilizados en este trabajo se descargaron del sistema de datos en línea Giovanni, desarrollado y  
593 mantenido por el GES DISC de la NASA.

594

## 595 **Referencias**

596 Caycedo-Charry O, Ospina AM, Buitrago-Cardona A, Borja-Acosta KG. 2021. Recomendaciones  
597 para registrar y almacenar señales acústicas como especímenes digitales en Colombia.  
598 *Biodiversidad en la Práctica* 6:e932.

599 e TM, Corrada-Bravo C, Campos-Cerqueira M, Milan C, Vega G, Alvarez R. 2013. Real-time  
600 bioacoustics monitoring and automated species identification. *PeerJ* 1:e103. DOI:  
601 10.7717/peerj.103.

602 e T, Hernández-Serna A, Campos-Cerqueira M, Acevedo-Charry O, Deichmann J. 2017. Species  
603 Richness (of Insects) Drives the Use of Acoustic Space in the Tropics. *Remote Sensing* 9:1096.  
604 DOI: 10.3390/rs9111096.

605 xander R, Meral G. 1967. Seasonal and Daily Chirping Cycles in the Northern Spring and Fall  
606 Field Crickets, *Gryllus Veletis* and *G. Pennsylvanicus*. *The Ohio Journal of Science* 67:200–209.  
607 [arbimon.rfcx.org](https://arbimon.rfcx.org). Rainforest Connection Arbimon. Available at <https://arbimon.rfcx.org/>

608 aker E, Chesmore D. 2020. Standardisation of bioacoustic terminology for insects. *Biodiversity*  
609 *Data Journal* 8:e54222. DOI: 10.3897/BDJ.8.e54222.

610 aker AA, Jonsson T, Aldridge S, Montealegre-Z F. 2019. Complex wing motion during stridulation in  
611 the katydid *Nastonotus foreli* (Orthoptera: Tettigoniidae: Pseudophyllinae). *Journal of Insect*  
612 *Physiology* 114:100–108. DOI: 10.1016/j.jinsphys.2019.03.005.

613 imstein DT, Mennill DJ, Clemins P, Girod L, Yao K, Patricelli G, Deppe JL, Krakauer AH, Clark C,  
614 Cortopassi KA, Hanser SF, McCowan B, Ali AM, Kirschel ANG. 2011. Acoustic monitoring in  
615 terrestrial environments using microphone arrays: applications, technological considerations  
616 and prospectus. *Journal of Applied Ecology* 48:758–767. DOI: 10.1111/j.1365-  
617 2664.2011.01993.x.

618 eckle M, Preininger D, Hödl W. 2009. Communication in Noisy Environments i: Acoustic Signals of  
619 *Stauroids Latopalminus Boulenger* 1887. *Herpetologica* 65:154–165. DOI: 10.1655/07-071R1.1.

620 aker B. 2007. *Ecology Ecological Models and Data in R*. Princeton and Oxford: Princeton  
621 University Press. DOI: 10.1086/644667.

622 adbury JW, Vehrencamp SL. 2011. *Principles of Animal Communication*. Sunderland, MA: Sinauer  
623 Associates, Inc.

624 uni A, Mennill DJ, Foote JR. 2014. Dawn chorus start time variation in a temperate bird  
625 community: relationships with seasonality, weather, and ambient light. *Journal of Ornithology*  
626 155:877–890. DOI: 10.1007/s10336-014-1071-7.

627 ellesbach J, Cash E, Schmitt T. 2018. Communication, Insects. In: Skinner M ed. *Encyclopedia of*  
628 *Reproduction*. Waltham MA: Elsevier, 78–83. DOI: 10.1016/B978-0-12-809633-8.20539-6.

629 dena-Castañeda OJ, Arango Díaz CJ, Grande López VH, Floréz Cárdenas ADP. 2021. Studies  
630 on Neotropical crickets: New species and notes on the classification of Field Crickets genera  
631 *Anurogryllus* and *Gryllus* (Orthoptera: Gryllidae: Gryllinae). *Zootaxa* 4970:515–532. DOI:  
632 10.11646/zootaxa.4970.3.4.

633 dena-Castañeda O, Prieto-Cristancho D, Romero-Betancourt L, Braun H, García García A. 2020.  
634 Studies in Neotropical Pseudophyllinae: A new genus of Cocconotini from the Colombian Andes  
635 and new subfamily assignment of the Dominican genus *Anacaona* (Tettigoniidae:  
636 Pseudophyllinae: Cocconotini). *Zootaxa* 4885:133–138. DOI: 10.11646/zootaxa.4885.1.9.

637 aker E, Jonsson T, Montealegre-Z F. 2020. On the tympanic membrane impedance of the katydid  
638 *Copiphora gorgonensis* (Insecta: Orthoptera: Tettigoniidae). *The Journal of the Acoustical*  
639 *Society of America* 148:1952–1960. DOI: 10.1121/10.0002119.

640 haya V, Lahiri S, Jagan MA, Mohan R, Pathaw NA, Krishnan A. 2021. Community Bioacoustics:  
641 Studying Acoustic Community Structure for Ecological and Conservation Insights. *Frontiers in*  
642 *Ecology and Evolution* 9:706445. DOI: 10.3389/fevo.2021.706445.



640 climate-Data.org. 2019. Climate Gachantivá (Colombia). Available at <https://en.climate->  
644 [data.org/south-america/colombia/boyaca/gachantiva-44435/](https://en.climate-data.org/south-america/colombia/boyaca/gachantiva-44435/)

645 Bari-Neto F, Zeileis A. 2010. Beta Regression in R. *Journal of Statistical Software* 34. DOI:  
646 10.18637/jss.v034.i02.

647 Richmann JL, Acevedo-Charry O, Barclay L, Burivalova Z, Campos-Cerqueira M, D'Horta F, Game  
648 ET, Gottesman BL, Hart PJ, Kalan AK, Linke S, Nascimento L Do, Pijanowski B, Staatterman E,  
649 Mitchell Aide T. 2018. It's time to listen: there is much to be learned from the sounds of tropical  
650 ecosystems. *Biotropica* 50:713–718. DOI: 10.1111/btp.12593.

651 Wakar S, Balakrishnan R. 2007a. The assemblage of acoustically communicating crickets of a  
652 tropical evergreen forest in Southern India: call diversity and diel calling patterns. *Bioacoustics*  
653 16:113–135. DOI: 10.1080/09524622.2007.9753571.

654 Wakar S, Balakrishnan R. 2007b. Vertical stratification in an acoustically communicating ensiferan  
655 assemblage of a tropical evergreen forest in southern India. *Journal of Tropical Ecology*  
656 23:479–486. DOI: 10.1017/S0266467407004208.

657 Newry GE, Rand AS. 1983. Characteristics of an Acoustic Community : Puerto Rican Frogs of the  
658 Genus *Eleutherodactylus*. *Copeia* 1983:941–953. DOI: <https://doi.org/1445095>.

659 nger N, Hödl W. 2003. Habitat acoustics of a neotropical lowland rainforest. *Bioacoustics* 13:297–  
660 321. DOI: 10.1080/09524622.2003.9753503.

661 ise, S, Guilhaumon F, Mou-Tham G, Urbina-Barreto I, Vigliola L, Kulbicki M, Bruggemann JH. 2022.  
662 Combining Passive Acoustics and Environmental Data for Scaling Up Ecosystem Monitoring: A Test on  
663 Coral Reef Fishes. *Remote Sensing* 14(10): 2394.

664 alk JJ, ter Hofstede HM, Jones PL, Dixon MM, Faure PA, Kalko EK V., Page RA. 2015. Sensory-  
665 based niche partitioning in a multiple predator–multiple prey community. *Proceedings of the*  
666 *Royal Society B: Biological Sciences* 282:20150520. DOI: 10.1098/rspb.2015.0520.

667 rina A. 2014. *Soundscape Ecology*. Dordrecht: Springer Netherlands. DOI: 10.1007/978-94-007-  
668 7374-5.

669 rina A, Ceraulo M. 2017. *Ecoacoustics: The ecological role of sounds*. Oxford, UK: John Wiley and  
670 Sons.

671 rreira LM, Oliveira EG, Lopes LC, Brito MR, Baumgarten J, Rodrigues FH, Sousa-Lima RS. 2018.  
672 What do insects, anurans, birds, and mammals have to say about soundscape indices in a  
673 tropical savanna. *Journal of Ecoacoustics* 2:#PVH6YZ. DOI: 10.22261/jea.pvh6yz.

674 tcher NH. 2004. A simple frequency-scaling rule for animal communication. *The Journal of the*  
675 *Acoustical Society of America* 115:2334–2338. DOI: 10.1121/1.1694997.

676 anklin M, Droege S, Dawson D, Royle JA. 2009. Nightly and Seasonal Patterns of Calling in  
677 Common True Katydid (Orthoptera: Tettigoniidae: Pterophylla camellifolia ). *Journal of*  
678 *Orthoptera Research* 18:15–18. DOI: 10.1665/034.018.0108.

679 sc A, Anso J, Sueur J, Jourdan H, Desutter-Grandcolas L. 2018. Cricket calling communities as  
680 an indicator of the invasive ant *Wasmannia auropunctata* in an insular biodiversity hotspot.  
681 *Biological Invasions* 20:1099–1111. DOI: 10.1007/s10530-017-1612-0.

682 dthi V, Balakrishnan R, Pratap R. 2022. The mechanics of acoustic signal evolution in field  
683 crickets. *Journal of Experimental Biology* 225(Suppl\_1): jeb243374.

684 ttesman BL, Olson JC, Yang S, Acevedo-Charry O, Francomano D, Martinez FA, Appeldoorn RS,  
685 Mason DM, Weil E, Pijanowski BC. 2021. What does resilience sound like? Coral reef and dry

686 forest acoustic communities respond differently to Hurricane Maria. *Ecological Indicators*  
687 126:107635. DOI: 10.1016/j.ecolind.2021.107635.

688 Maldini D, Engel MS. 2005. *Evolution of the Insects*. New York, NY: Cambridge University Press.

689 Rinicke S, Kalan AK, Wagner OJJ, Mundry R, Lukashevich H, Kühl HS. 2015. Assessing the  
690 performance of a semi-automated acoustic monitoring system for primates. *Methods in Ecology*  
691 *and Evolution* 6:753–763. DOI: 10.1111/2041-210X.12384.

692 Hofstede H, Voigt-Heucke S, Lang A, Römer H, Page R, Faure P, Dechmann D. 2017. Revisiting  
693 adaptations of neotropical katydids (Orthoptera: Tettigoniidae) to gleaning bat predation.  
694 *Neotropical Biodiversity* 3:41–49. DOI: 10.1080/23766808.2016.1272314.

695 Huffman GJ, Stocker DT, Bolvin EJ, Nelkin JT. 2022. GPM IMERG Final Precipitation L3 1 day 0.1  
696 degree x 0.1 degree V06. DOI: 10.5067/GPM/IMERGDF/DAY/06.

697 Wang YP, Prestwich KN. 2004. Is significant acoustic energy found in the audible and ultrasonic  
698 harmonics in cricket calling songs? *Journal of Orthoptera Research* 13:231–238. DOI:  
699 [https://doi.org/10.1665/1082-6467\(2004\)013\[0231:ISAEFI\]2.0.CO;2](https://doi.org/10.1665/1082-6467(2004)013[0231:ISAEFI]2.0.CO;2).

700 Don M, Balakrishnan R. 2012. Does acoustic adaptation drive vertical stratification? A test in a  
701 tropical cricket assemblage. *Behavioral Ecology* 23:343–354. DOI: 10.1093/beheco/arr191.

702 Don M, Diwakar S, Bahuleyan J, Deb R, Balakrishnan R. 2014. A rain forest dusk chorus: cacophony  
703 or sounds of silence? *Evolutionary Ecology* 28:1–22. DOI: 10.1007/s10682-013-9658-7.

704 Liuzkov A, Bas Y, Kerbiriou C, Julien JF, Penone C, Le Viol I. 2016. Large-scale semi-automated  
705 acoustic monitoring allows to detect temporal decline of bush-crickets. *Global Ecology and*  
706 *Conservation* 6:208–218. DOI: 10.1016/j.gecco.2016.02.008.

707ause BL. 1993. The Niche Hypothesis: A Virtual Symphony of Animal Sounds, The Origins of  
708 Musical Expression and the Health of Habitats. *The Soundscape Newsletter* 6:6–10.

709 Wang AB, Kalko EKV, Römer H, Bockholdt C, Dechmann DKN. 2006. Activity levels of bats and  
710 katydids in relation to the lunar cycle. *Oecologia* 146:659–666. DOI: 10.1007/s00442-005-0131-  
711 3.

712app S, Wu T, Richards-Zawacki C, Voyles J, Rodriguez KM, Shamon H, Kitzes J. 2021. Automated  
713 detection of frog calls and choruses by pulse repetition rate. *Conservation Biology* 35(5): 1659-  
714 1668.

715Geoch MA. 2007. Insects and Bioindication. In: Stewart AJA, New TR, Lewis OT eds. *Insect*  
716 *conservation biology*. Wallingford: CABI, 144–174.

717Montealegre-Z F, Sarria FA, Pimienta MC, Mason AC. 2014. Lack of correlation between vertical  
718 distribution and carrier frequency, and preference for open spaces in arboreal katydids that use  
719 extreme ultrasound, in Gorgona, Colombia (Orthoptera: Tettigoniidae). *Revista de Biología*  
720 *Tropical* 62:289. DOI: 10.15517/rbt.v62i0.16342.

721cenaudio Team. 2015. ocenaudio.

722Spina OE, Villanueva-Rivera LJ, Corrada-Bravo CJ, Aide TM. 2013. Variable response of anuran  
723 calling activity to daily precipitation and temperature: implications for climate change. *Ecosphere*  
724 4:art47. DOI: 10.1890/ES12-00258.1.

725Romino-Ángel S, Anaya-Acevedo JA, Botero BA. 2019. Evaluation of 3B42V7 and IMERG daily-  
726 precipitation products for a very high-precipitation region in northwestern South America.  
727 *Atmospheric Research* 217:37–48. DOI: 10.1016/j.atmosres.2018.10.012.

728esetto D, Arenas-Castro S, Bustamante J, Casagrandi R, Chrysoulakis N, Cord AF, Dittrich A,  
729 Domingo-Marimon C, El Serafy G, Karnieli A, Kordelas GA, Manakos I, Mari L, Monteiro A,

730 Palazzi E, Poursanidis D, Rinaldo A, Terzago S, Ziemba A, Ziv G. 2018. Integration of satellite  
731 remote sensing data in ecosystem modelling at local scales: Practices and trends. *Methods in*  
732 *Ecology and Evolution* 9:1810–1821. DOI: 10.1111/2041-210X.13018.

733 Perez-Granados C, Schuchmann K-L, Marques MI. 2022. Addicted to the moon: vocal output and  
734 diel pattern of vocal activity in two Neotropical nightjars is related to moon phase. *Ethology*  
735 *Ecology & Evolution* 34:66–81. DOI: 10.1080/03949370.2021.1886182.

736 Pettorelli N, Laurance WF, O'Brien TG, Wegmann M, Nagendra H, Turner W. 2014. Satellite remote  
737 sensing for applied ecologists: opportunities and challenges. *Journal of Applied Ecology*  
738 51:839–848. DOI: 10.1111/1365-2664.12261.

739 Prakash H, Greif S, Yovel Y, Balakrishnan R. 2021. Acoustically eavesdropping bat predators take  
740 longer to capture katydid prey signalling in aggregation. *Journal of Experimental Biology* 224:1–  
741 9. DOI: 10.1242/jeb.233262.

742 QGIS Development Team. 2022. QGIS: qgis.org.

743 Rout MS, Linkie M. 2009. Estimating overlap of daily activity patterns from camera trap data.  
744 *Journal of Agricultural, Biological, and Environmental Statistics* 14:322–337. DOI:  
745 10.1198/jabes.2009.08038.

746 Riede K. 1996. Diversity of sound-producing insects in a Bornean lowland rain forest. :77–84. DOI:  
747 10.1007/978-94-009-1685-2\_8.

748 Riede K. 1998. Acoustic monitoring of Orthoptera and its potential for conservation. *Journal of Insect*  
749 *Conservation* 2:217–223. DOI: 10.1023/a:1009695813606.

750 Riede K. 2018. Acoustic profiling of Orthoptera: present state and future needs. *Journal of*  
751 *Orthoptera Research* 27:203–215. DOI: 10.3897/jor.27.23700.

752 Römer H, Holderied M. 2020. Decision making in the face of a deadly predator: high-amplitude  
753 behavioural thresholds can be adaptive for rainforest crickets under high background noise  
754 levels. *Philosophical Transactions of the Royal Society B: Biological Sciences* 375:20190471.  
755 DOI: 10.1098/rstb.2019.0471.

756 Römer H, Lang A, Hartbauer M. 2010. The Signaller's Dilemma: A Cost–Benefit Analysis of Public  
757 and Private Communication. *PLoS ONE* 5:e13325. DOI: 10.1371/journal.pone.0013325.

758 Römer H, Lewald J. 1992. High-frequency sound transmission in natural habitats: implications for the  
759 evolution of insect acoustic communication. *Behavioral Ecology and Sociobiology* 29:437–444.  
760 DOI: 10.1007/BF00170174.

761 Schielzeth H. 2010. Simple means to improve the interpretability of regression coefficients. *Methods*  
762 *in Ecology and Evolution* 1:103–113. DOI: 10.1111/j.2041-210X.2010.00012.x.

763 Schmidt AKD, Balakrishnan R. 2015. Ecology of acoustic signalling and the problem of masking  
764 interference in insects. *Journal of Comparative Physiology A* 201:133–142. DOI:  
765 10.1007/s00359-014-0955-6.

766 Schmidt AKD, Römer H, Riede K. 2013. Spectral niche segregation and community organization in a  
767 tropical cricket assemblage. *Behavioral Ecology* 24:470–480. DOI: 10.1093/beheco/ars187.

768 Smithson M, Verkuilen J. 2006. A better lemon squeezer? Maximum-likelihood regression with beta-  
769 distributed dependent variables. *Psychological Methods* 11:54–71. DOI: 10.1037/1082-  
770 989X.11.1.54.

771 Steinfath E, Palacios-Muñoz A, Rottschäfer JR, Yezak D, Clemens J. (2021). Fast and accurate  
772 annotation of acoustic signals with deep neural networks. *Elife* 10: e68837.

770 gai LSM, Desjonquères C, Silva TSF, Llusia D. 2020. A roadmap for survey designs in terrestrial  
774 acoustic monitoring. *Remote Sensing in Ecology and Conservation* 6:220–235. DOI:  
775 10.1002/rse2.131.

776 gai LSM, Silva TSF, Ribeiro JW, Llusia D. 2019. Terrestrial Passive Acoustic Monitoring: Review  
777 and Perspectives. *BioScience* 69:15–25. DOI: 10.1093/biosci/biy147.

778 ymes LB, Robillard T, Martinson SJ, Dong J, Kernan CE, Miller CR, Ter Hofstede HM. 2021. Daily  
779 Signaling Rate and the Duration of Sound per Signal are Negatively Related in Neotropical  
780 Forest Katydid. In: *Integrative and Comparative Biology*. Oxford University Press, 887–899.  
781 DOI: 10.1093/icb/icab138.

782 an MK, Malem J, Legendre F, Dong J, Baroga-Barbecho JB, Yap SA, Wahab R bin HA, Japir R,  
783 Chung AYC, Robillard T. 2021. Phylogeny, systematics and evolution of calling songs of the  
784 Lebinthini crickets (Orthoptera, Grylloidea, Eneopterinae), with description of two new genera.  
785 *Systematic Entomology* 46:1060–1087. DOI: 10.1111/syen.12510.

786 eurmél B, Elmarhraoui A. 2019. suncalc: Compute Sun Position, Sunlight Phases, Moon Position  
787 and Lunar Phase.

788 bias JA, Planque R, Cram DL, Seddon N. 2014. Species interactions and the structure of complex  
789 communication networks. *Proceedings of the National Academy of Sciences* 111:1020–1025.  
790 DOI: 10.1073/pnas.1314337111.

791 ívar García JD, Acevedo-Charry O. 2021. Conjunto de datos de monitoreo acústico pasivo en la  
792 Reserva Natural Los Yátaros, Gachantivá, Boyacá, Colombia. *Biota Colombiana* 22. DOI:  
793 10.21068/c2021.v22n01a13.

794 ulla E, Muñoz M, Quiroga N, Symes L, ter Hofstede HM, Page RA, Simon R, Ellers J, Halfwerk W.  
795 2020. Gone with the wind: Is signal timing in a neotropical katydid an adaptive response to  
796 variation in wind-induced vibratory noise? *Behavioral Ecology and Sociobiology* 74:59. DOI:  
797 10.1007/s00265-020-02842-z.

798 anueva-Rivera LJ. 2014. Eleutherodactylus frogs show frequency but no temporal partitioning:  
799 implications for the acoustic niche hypothesis. *PeerJ* 2:e496. DOI: 10.7717/peerj.496.

800 allschläger D. 1980. Correlation of song frequency and body weight in passerine birds. *Experientia*  
801 36:412.

802 ang T, Zhou Y, Zhu Z, Li X, Asrar G. 2021. A global seamless 1 km resolution daily land surface  
803 temperature dataset (2003 – 2020). DOI: 10.25380/iastate.c.5078492.v3.

804 ang T, Zhou Y, Zhu Z, Li X, Asrar GR. 2022. A global seamless 1 km resolution daily land surface  
805 temperature dataset (2003–2020). *Earth System Science Data* 14:651–664. DOI: 10.5194/essd-  
806 14-651-2022.

807
