# Supplementary material for: Satellite remote sensing of environmental variables can predict acoustic activity of an orthopteran assemblage
Source: PeerJ journal article supplement (doi:10.7717/peerj.13969), 2022-09-02

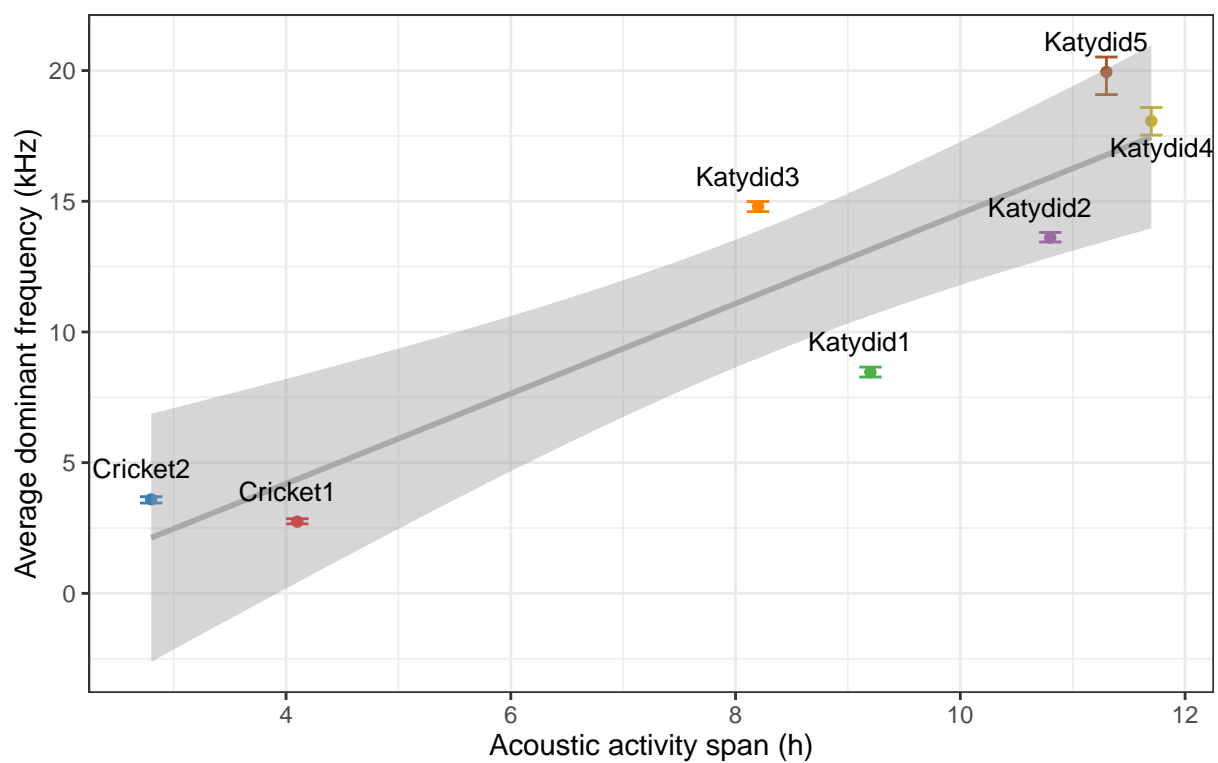

Supplement: Supplemental_Figure_1.pdf [file Supplemental_Figure_1.pdf]
